# Supplementary material for: Embryonic Stem Cell-Derived Peripheral Auditory Neurons Form Neural Connections with Mouse Central Auditory Neurons In Vitro via the α2δ1 Receptor
Source: PubMed Central journal article supplement — Stem Cell Reports. 2018 Jun 7;11(1):157–70. doi: 10.1016/j.stemcr.2018.05.006 (PMC6066995; doi:10.1016/j.stemcr.2018.05.006), 2018-06-07
Supplement: mmc1.pdf [file mmc1.pdf]

**Stem Cell Reports, Volume 11**

**Supplemental Information**

**Embryonic Stem Cell-Derived Peripheral Auditory Neurons Form Neural Connections with Mouse Central Auditory Neurons *In Vitro* via the  $\alpha 2\delta 1$  Receptor**

**Zhenjie Liu, Yiyun Jiang, Xiaoyang Li, and Zhengqing Hu**

## Supplemental Information

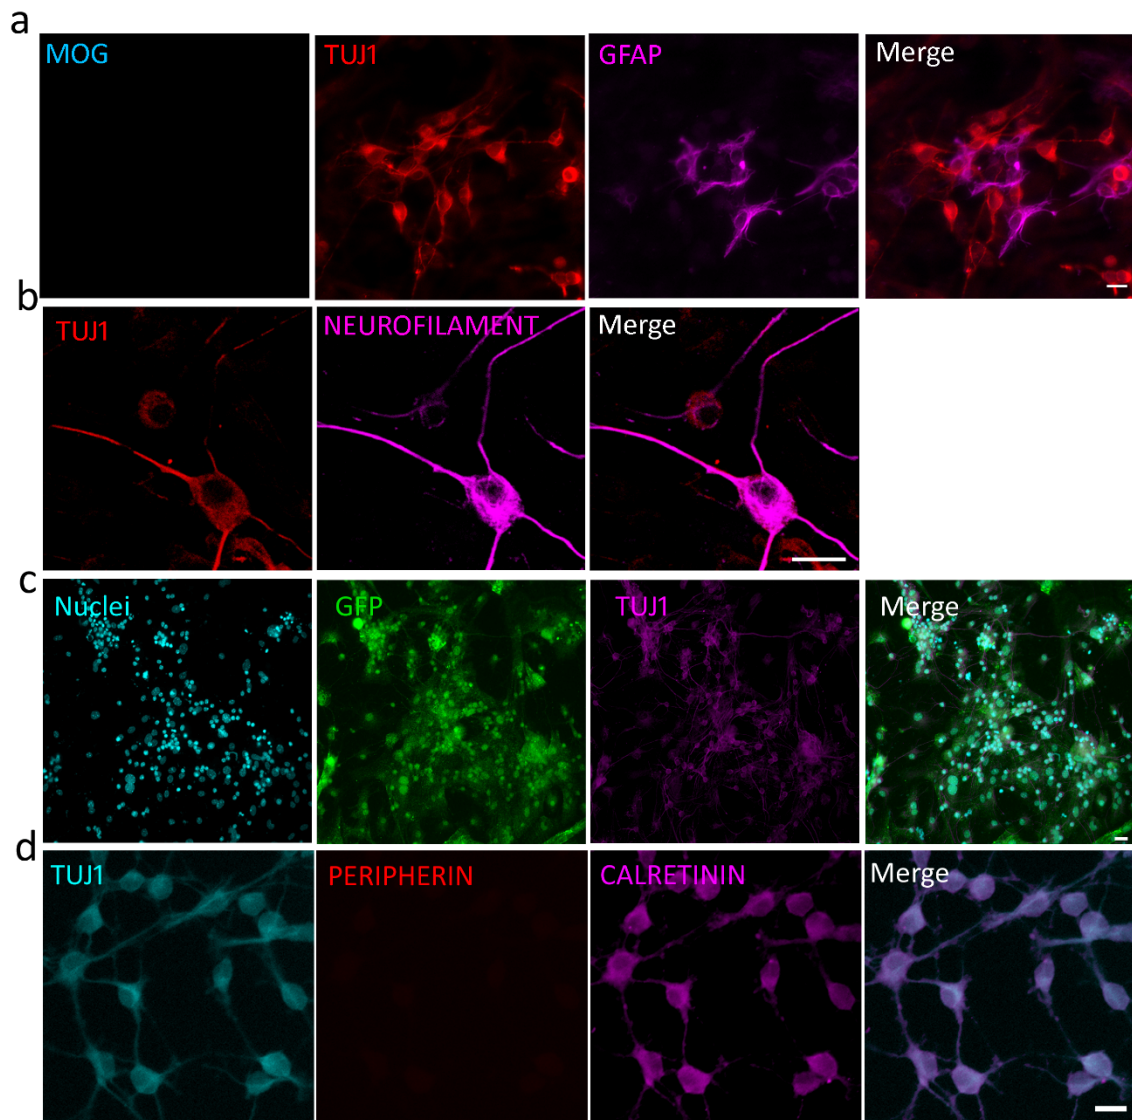

**Figure S1. Neuronal differentiation of 4C2 ES cells, related to Figure 2.**

(a) Immunofluorescence shows ESNs express TUJ1 and GFAP, but not MOG.

(b) Immunofluorescence shows TUJ1-positive cells are also labeled by NEUROFILAMENT.

(c) Immunofluorescence shows that all 4C2-derived cells express GFP and some of them are double-labeled with TUJ1.

(d) Immunofluorescence shows all TUJ1-positive cells are labeled by anti-CALRETININ but not anti-PERIPHERIN antibodies.

Data shown in all panels represent eight pooled independent biological experiments.

Scale bar: 20  $\mu\text{m}$  in a, b, d and f; 50  $\mu\text{m}$  in c.

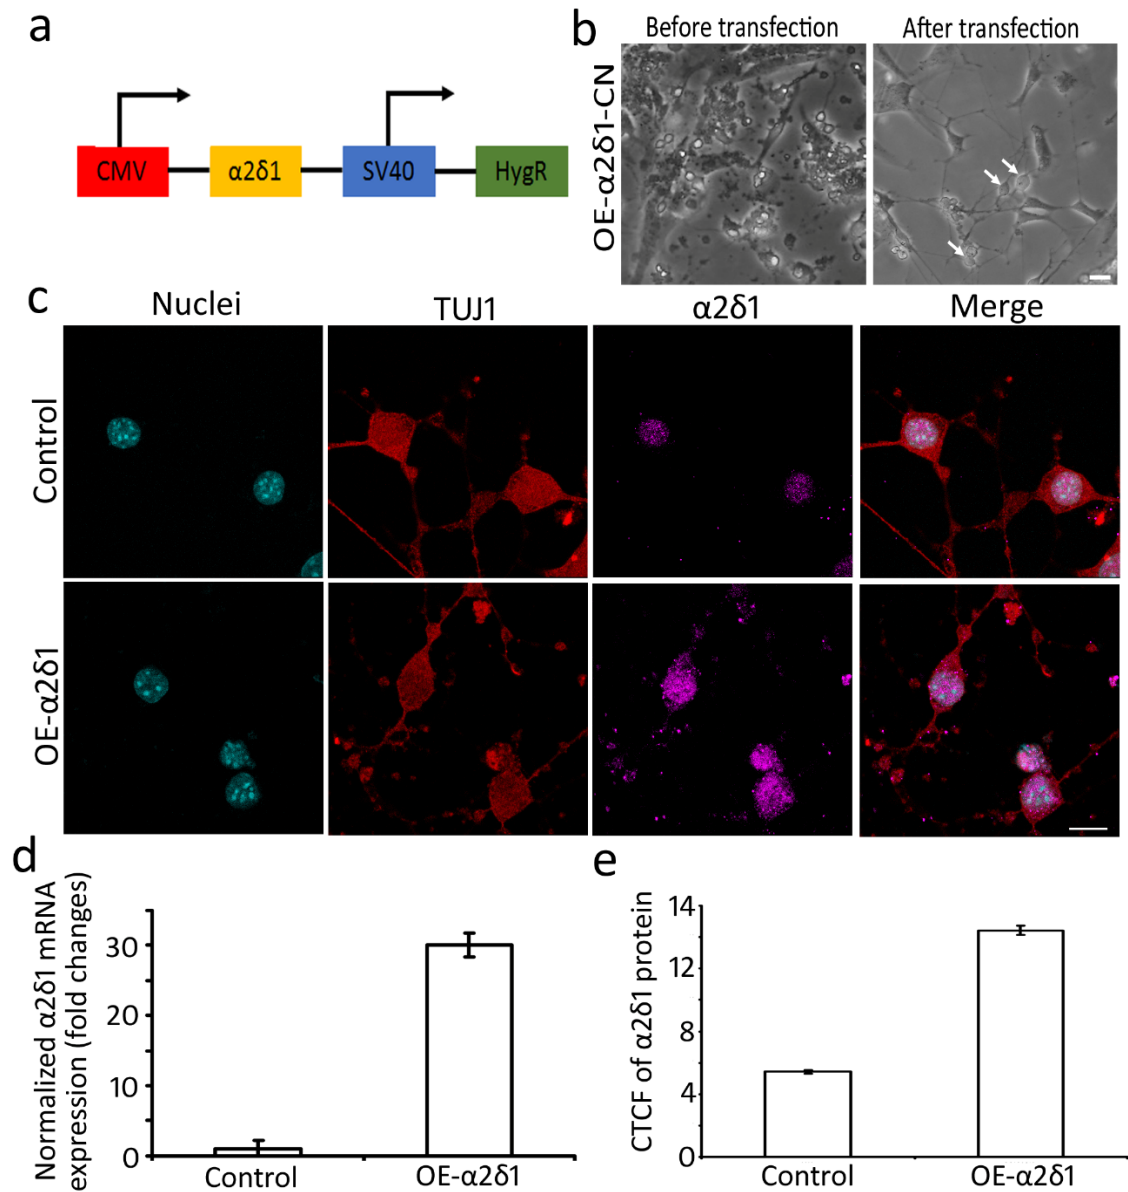

**Figure S2. Overexpression of  $\alpha 2\delta 1$  in CN neurons, related to Figure 5.**

- (a) A diagram designates the  $\alpha 2\delta 1$ -plasmid for CN neurons overexpression.
- (b) Phase contrast images show CN cells before (left panel) and after transfection of  $\alpha 2\delta 1$ -plasmids followed by hygromycin antibiotic selection (right panel). After antibiotic selection, a few neuron-like cells are observed (arrows).
- (c) Immunofluorescence shows that CN neurons overexpressing  $\alpha 2\delta 1$  (OE- $\alpha 2\delta 1$ ) expresses more  $\alpha 2\delta 1$  proteins than that of wildtype CN neurons (control).
- (d) Compared to the control group, qPCR shows approximately 30-fold up-regulation of  $\alpha 2\delta 1$  expression in the OE- $\alpha 2\delta 1$  group.
- (e) Compared to the control group, quantification corrected total cell fluorescence (CTCF) study shows approximately 3-fold up-regulation of  $\alpha 2\delta 1$  protein expression in the OE- $\alpha 2\delta 1$  group.

Data shown in all panels represent four pooled independent biological experiments.

Scale bar: 20  $\mu\text{m}$  in b; 10  $\mu\text{m}$  in c.

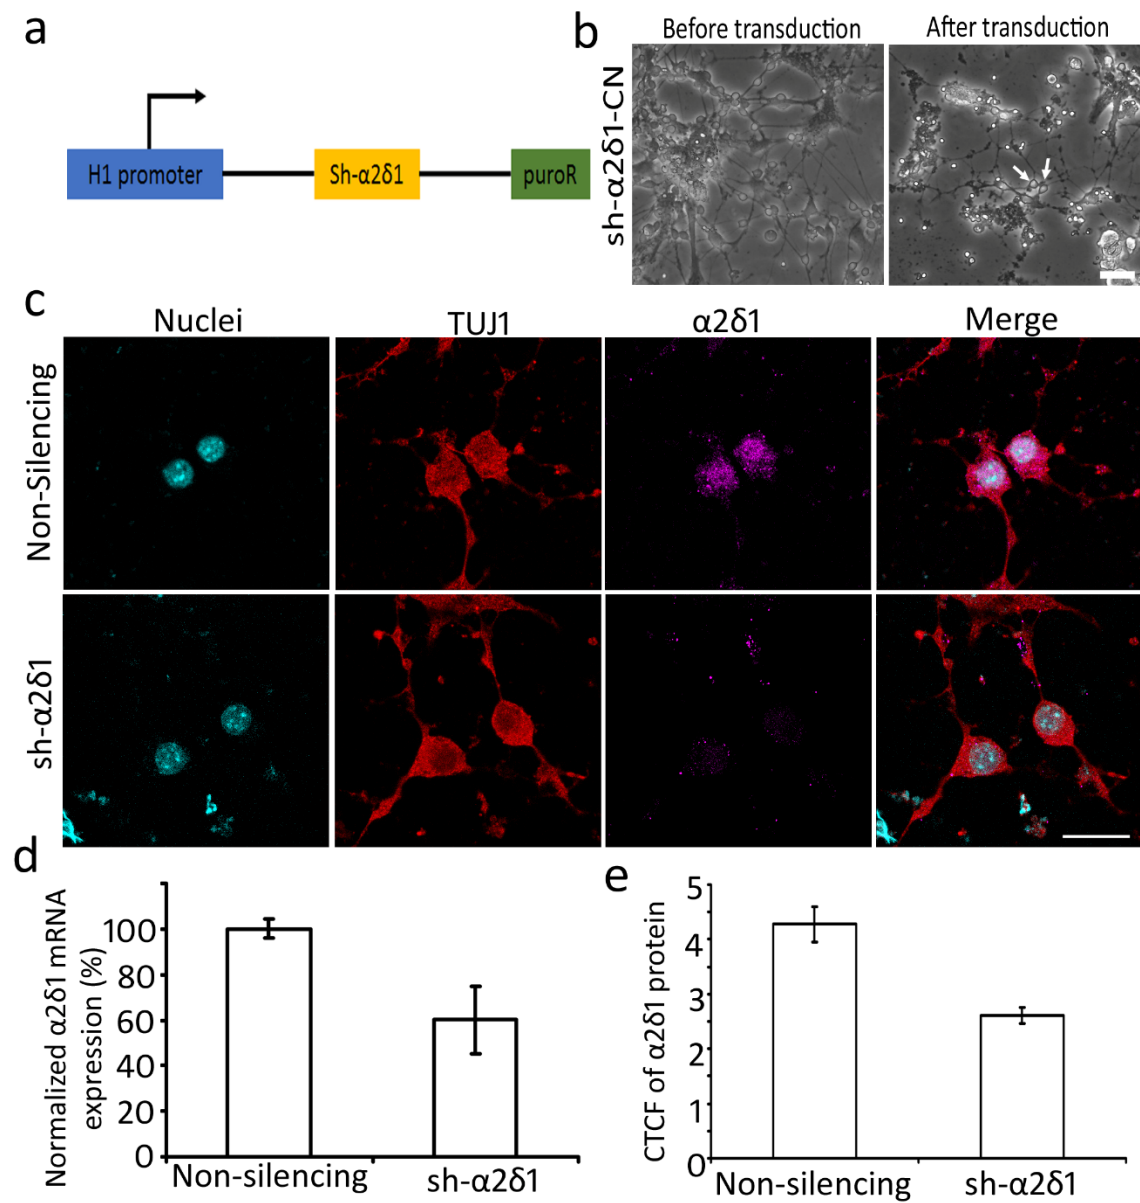

**Figure S3. Silencing of  $\alpha 2\delta 1$  in CN neurons, related to Figure 5.**

- (a) A diagram designates the sh- $\alpha 2\delta 1$ -plasmid for CN neurons silencing.
- (b) Phase contrast images show CN cells before (left panel) and after transduction of virus containing sh- $\alpha 2\delta 1$ -plasmids followed by puromycin antibiotic selection (right panel). After antibiotic selection, a few neuron-like cells are found (arrows).
- (c) Compared to the non-silencing group, wildtype CN neurons treated with virus containing the sh- $\alpha 2\delta 1$  vector (sh- $\alpha 2\delta 1$ ) express a reduced level of  $\alpha 2\delta 1$  proteins.
- (d) Compared to the non-silencing group, qPCR showed approximately 40% down-regulation of  $\alpha 2\delta 1$  expression in the sh- $\alpha 2\delta 1$  group.
- (e) Compared to the control group, quantification corrected total cell fluorescence (CTCF) study shows approximately 50% down-regulation of  $\alpha 2\delta 1$  protein expression in the sh- $\alpha 2\delta 1$  group.

Data shown in all panels represent four pooled independent biological experiments.

Scale bar: 50  $\mu\text{m}$  in b; 20  $\mu\text{m}$  in c.

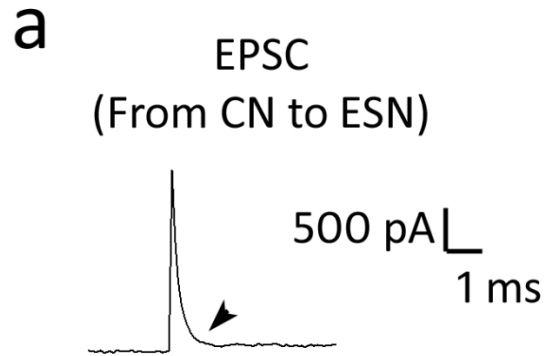

**Figure S4. Evaluation of EPSCs in the co-culture, related to Figure 7.**

Pair recording EPSC electrophysiology is used to study the function of new synapses. In the same sample that observes EPSCs on the CN neuron in response to ESN depolarization (Fig. 7d), inward currents are not found on ESN following CN depolarization, suggesting that the neural activity is directional, and that the ESN is pre-synaptic and the CN neuron is post-synaptic neurons.

Data shown in all panels represent six pooled independent biological experiments.

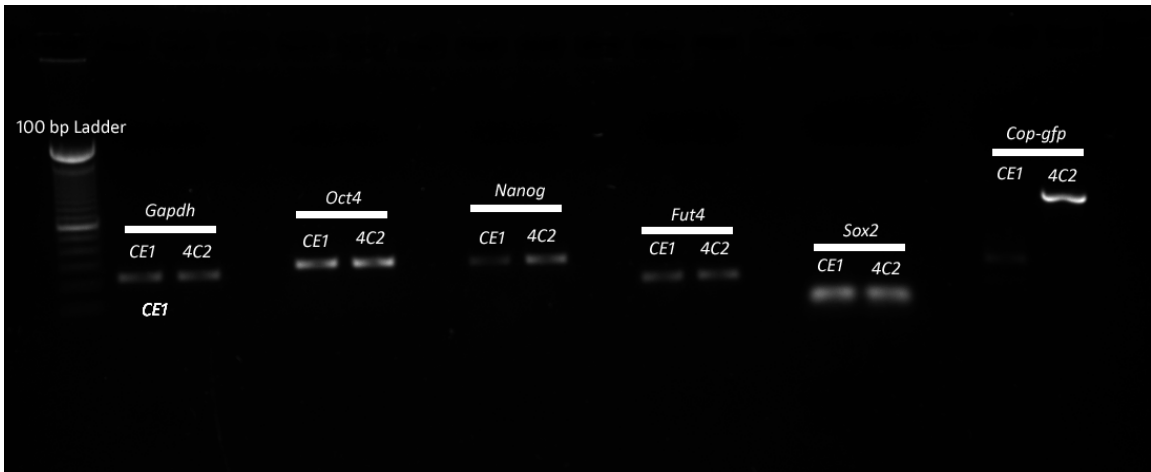

Figure S5. Original RT-PCR electrophoresis gel of Fig. 1d.

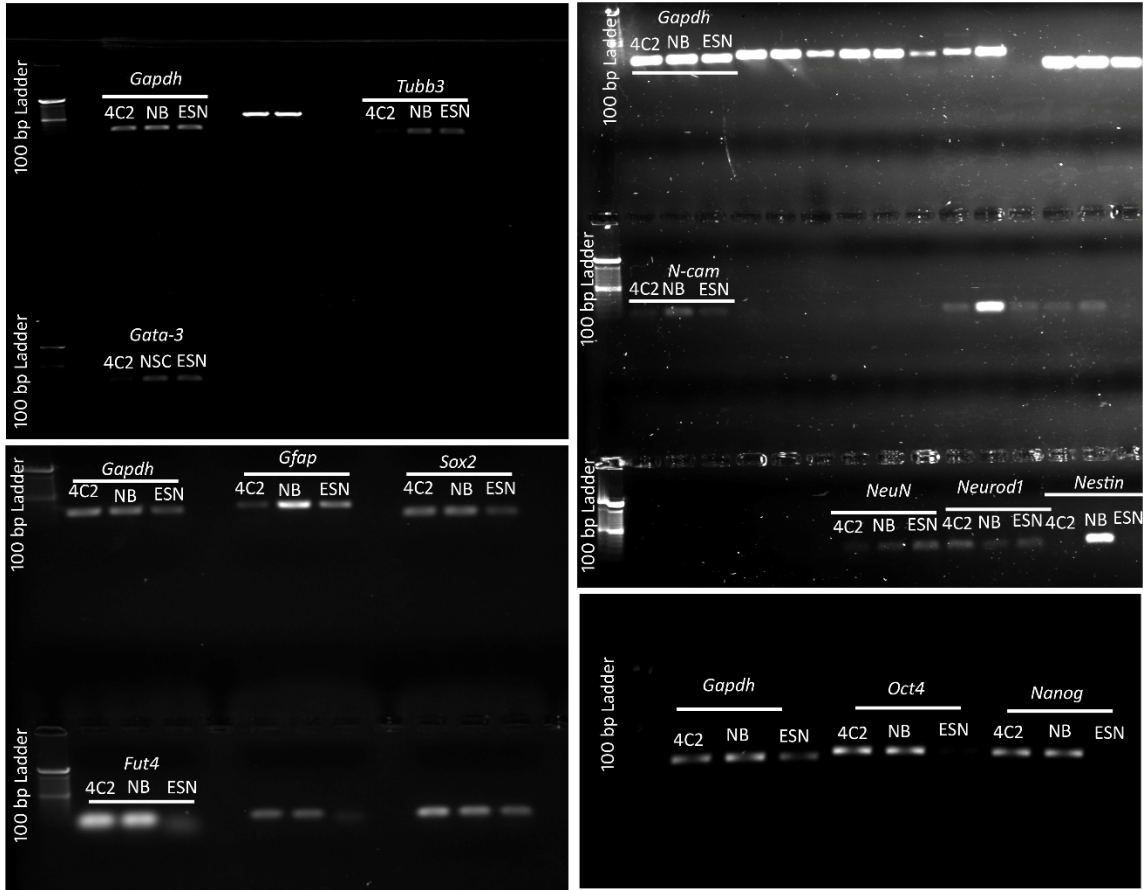

Figure S6. Original RT-PCR electrophoresis gel of Fig. 2b1.



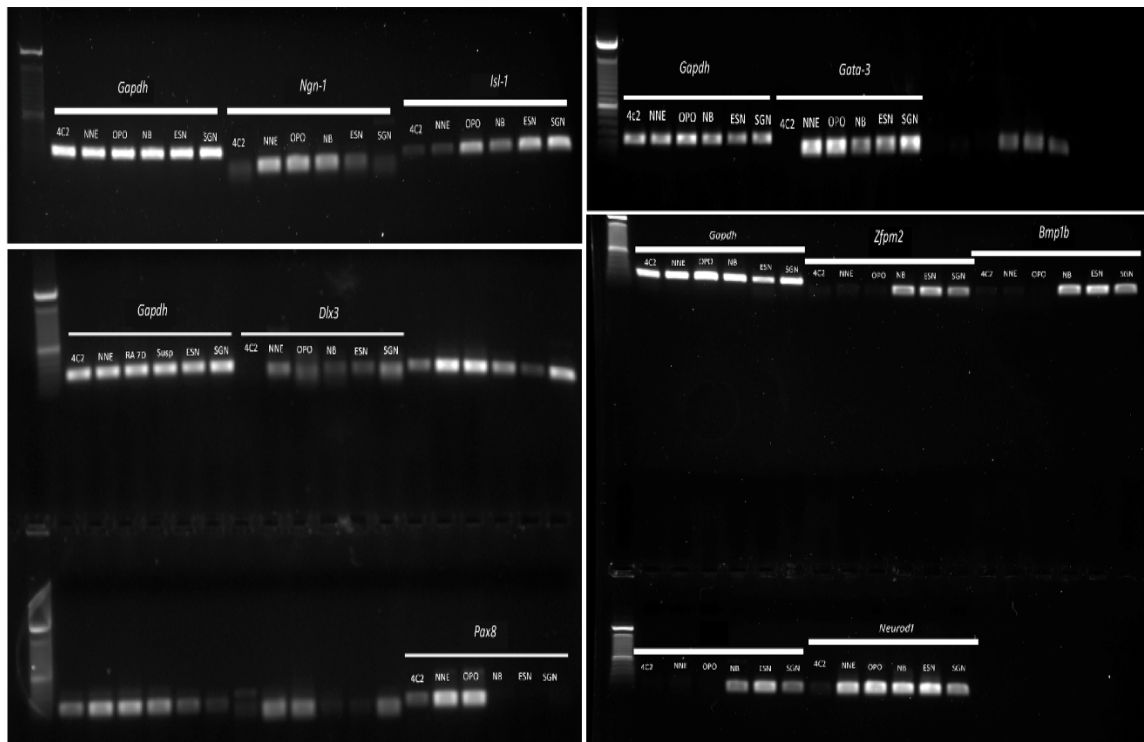

Figure S7. Original RT-PCR electrophoresis gel of Fig. 2b2.

**Table S1. ANOVA analysis of TSP1 treatment in co-cultures, related to Figure 3**

**The number of puncta**

| <i>Source of Variation</i> | <i>SS</i> | <i>df</i> | <i>MS</i> | <i>F</i> | <i>P-value</i> |
|----------------------------|-----------|-----------|-----------|----------|----------------|
| Treatment                  | 53.4321   | 5         | 10.6864   | 27.5234  | 3.02E-12       |
| Error                      | 16.3072   | 42        | 0.3883    |          |                |
| Total                      | 69.7393   | 47        |           |          |                |

**The area of puncta**

| <i>Source of Variation</i> | <i>SS</i> | <i>df</i> | <i>MS</i> | <i>F</i> | <i>P-value</i> |
|----------------------------|-----------|-----------|-----------|----------|----------------|
| Treatment                  | 32.2317   | 5         | 6.4436    | 21.1483  | 1.66E-10       |
| Error                      | 12.8023   | 42        | 0.3048    |          |                |
| Total                      | 45.034    | 47        |           |          |                |

Table S2. ANOVA analysis of gabapentin treatments in co-cultures, related to Figure 4

The number of puncta

| <i>Source of Variation</i> | <i>SS</i> | <i>df</i> | <i>MS</i> | <i>F</i> | <i>P-value</i> |
|----------------------------|-----------|-----------|-----------|----------|----------------|
| Treatment                  | 1421.18   | 6         | 236.86    | 9.6812   | 1.34E-07       |
| Error                      | 1590.32   | 65        | 24.466    |          |                |
| Total                      | 3011.50   | 71        |           |          |                |

The area of puncta

| <i>Source of Variation</i> | <i>SS</i> | <i>df</i> | <i>MS</i> | <i>F</i> | <i>P-value</i> |
|----------------------------|-----------|-----------|-----------|----------|----------------|
| Treatment                  | 39.839    | 6         | 6.6398    | 10.498   | 3.77E-08       |
| Error                      | 41.7459   | 66        | 0.6325    |          |                |
| Total                      | 81.5849   | 72        |           |          |                |

**Table S3. Primers of RT-PCR and quantitative RT-PCR in Figures 1 and 2**

| <b>Gene</b>                          | <b>Forward</b>          | <b>Reverse</b>          | <b>Product length (bp)</b> |
|--------------------------------------|-------------------------|-------------------------|----------------------------|
| <i>Gapdh</i>                         | GGCCGCATCTTCTTGTGCAGT   | TTCTCGGCCTTGACTGTGCCGTT | 229                        |
| <i>Pou5f1</i>                        | CGAACCTGGCTAAGCTTCCA    | TCCACCTTCTCCAACCTCACG   | 219                        |
| <i>Nanog</i>                         | ACGCTGATGACCTTATCTGCG   | AAGCAGAAGATGCGGACTGTG   | 226                        |
| <i>Fut4</i>                          | CGCACGGATAAGGCGCTGGT    | CGGGTCCCGTCCGACCAAAC    | 409                        |
| <i>Sox2</i>                          | ACGCCTTCATGGTATGGTCC    | TCATGCTGTAGCTGCCGTTG    | 219                        |
| <i>Cop-gfp</i>                       | ATGGAGAGCGACGAGAGCG     | GCGAGATCCGGTGGAGC       | 669                        |
| <i>Nes</i>                           | GCCTGGATCTGGAAGTCAACA   | TCTGGCATTCCCTGAGCAAC    | 306                        |
| <i>N-cam</i>                         | GACAGAACCCGAAAAGGGC     | GTTGGGGACCGTCTTGACTT    | 94                         |
| <i>Gfap</i>                          | CGCTTCTCCTTGTCTCGAATG   | GCTCGAAGCTGGTTCAGTTCA   | 212                        |
| <i>Tubb3</i>                         | CCTTGTGTCTGCCACCATGA    | CATCGAACATCTGCTGCGTG    | 206                        |
| <i>Neurod1</i>                       | AGCCCTGATCTGGTCTCCTT    | AAAGTCCGAGGGTTGAGCTG    | 101                        |
| <i>Neun</i>                          | ATCGTAGAGGGACGGAAAATTGA | GTTCCCAGGCTTCTTATTGGTC  | 72                         |
| <i>Slc17a7</i>                       | TGGCTGTGCATCTTCGTGA     | CCAGCCGACTCCGTTCTAAG    | 113                        |
| <i>Gata3</i>                         | CTCGGCCATTCGTACATGGAA   | GGATACCTCTGCACCGTAGC    | 134                        |
| <i><math>\alpha 2\delta 1</math></i> | CTTCGCCCCGTCACTATCAAGT  | CCAGTTGGCGTGCATTGTTG    | 153                        |
| <i>Dlx3</i>                          | TTTTTGAACCTGGAGCGGCG    | TTCTGTTCAAGTCCGGGTCG    | 225                        |
| <i>Bmpr1b</i>                        | CTCCCTCTGCTGGTCCAAAG    | GCTTCCTCCGTGGTGAAGAA    | 143                        |
| <i>Zprm2</i>                         | GTGACATGGCAAGGAGTGGA    | CAAAGTCCACCACAAAGGCG    | 130                        |
| <i>Pax8</i>                          | AGACTACAAGCGGCAGAACC    | GAAGGTGCTTTCGAGGACCA    | 153                        |
| <i>Trkc</i>                          | GCAATGCCAGTGTTGCTCTC    | ACGCACCACAACTCAATGC     | 101                        |

**Table S4. Primary antibodies in Figures 1-6**

| <b>Primary antibody</b> | <b>Company</b> | <b>Cat #</b> | <b>Dilution</b> |
|-------------------------|----------------|--------------|-----------------|
| OCT4                    | R&D            | MAB1759      | 1:200           |
| NANOG                   | R&D            | AF2729       | 1:200           |
| SSEA1                   | R&D            | MAB2155      | 1:200           |
| SOX2                    | R&D            | AF2018       | 1:200           |
| NESTIN                  | DSHB           | RAT-401      | 1:100           |
| N-CAM                   | STCZ           | SC-106       | 1:100           |
| A2B5                    | R&D            | MAB1416      | 1:400           |
| GFAP                    | STCZ           | SC-6170      | 1:200           |
| TUJ1                    | AVES           | TUJ          | 1:500           |
| NEUN                    | Millipore      | MAB377       | 1:100           |
| NEUROD1                 | STCZ           | SC46684      | 1:200           |
| VGLUT1                  | Neuromab       | 73-066       | 1:50            |
| MOG                     | Millipore      | AB5680       | 1:200           |
| GATA3                   | Sigma          | HPA029731    | 1:200           |
| TRKB                    | R&D            | MAB1494      | 1:200           |
| TRKC                    | R&D            | AF1404       | 1:200           |
| NA-V                    | Millipore      | AB5210       | 1:100           |
| SV2                     | DSHB           | SV2-a        | 1:50            |
| $\alpha 2\delta 1$      | Sigma          | C5105        | 1:1000          |
| TGFP                    | Thermofisher   | PA5-22688    | 1:2000          |
| PERIPHERIN              | Millipore      | MAB1527      | 1:200           |
| CALRETININ              | Chemicon       | AB1550       | 1:200           |
| CTBP2                   | BD             | 612044       | 1:500           |
| NEUROFILAMENT           | AVES           | NFL          | 1:1500          |
| MYOSIN VIIA             | DSHB           | 138-1        | 1:200           |

**Table S5. Secondary antibodies in Figures 1-6**

| <b>Secondary antibody</b>               | <b>Company</b> | <b>Cat #</b> | <b>Dilution</b> |
|-----------------------------------------|----------------|--------------|-----------------|
| AMCA Donkey anti-Chicken IgY            | Jackson IR     | 703-156-155  | 1:500           |
| Alexa Fluor 488 Donkey anti-Rabbit IgG  | Jackson IR     | 711-546-152  | 1:500           |
| Cy3 Donkey anti-Chicken IgY             | Jackson IR     | 703-166-155  | 1:500           |
| Cy3 Donkey anti-Mouse IgG               | Jackson IR     | 715-166-150  | 1:500           |
| Cy3 Donkey anti-Rabbit IgG              | Jackson IR     | 711-165-152  | 1:500           |
| Cy3 Donkey anti-Goat IgG                | Jackson IR     | 705-166-147  | 1:500           |
| Cy3 Fab Fragment Goat anti-Mouse IgG    | Jackson IR     | 115-167-003  | 1:500           |
| Alexa Fluor 647 Donkey anti-Chicken IgY | Jackson IR     | 703-496-155  | 1:500           |
| Alexa Fluor 647 Donkey anti-Mouse IgG   | Jackson IR     | 715-496-150  | 1:500           |
| Alexa Fluor 647 Donkey anti-Goat IgG    | Jackson IR     | 705-496-147  | 1:500           |
| Alexa Fluor 647 Donkey anti-Rabbit IgG  | Jackson IR     | 711-496-152  | 1:500           |
